# Supplementary material
Source: PubMed Central journal article supplement (PMC4925323)
Supplement: NIHMS790103-supplement-Supp_Info.pdf [file NIHMS790103-supplement-Supp_Info.pdf]

Supplemental Information for Cahoon et al.  
Supplemental Figures

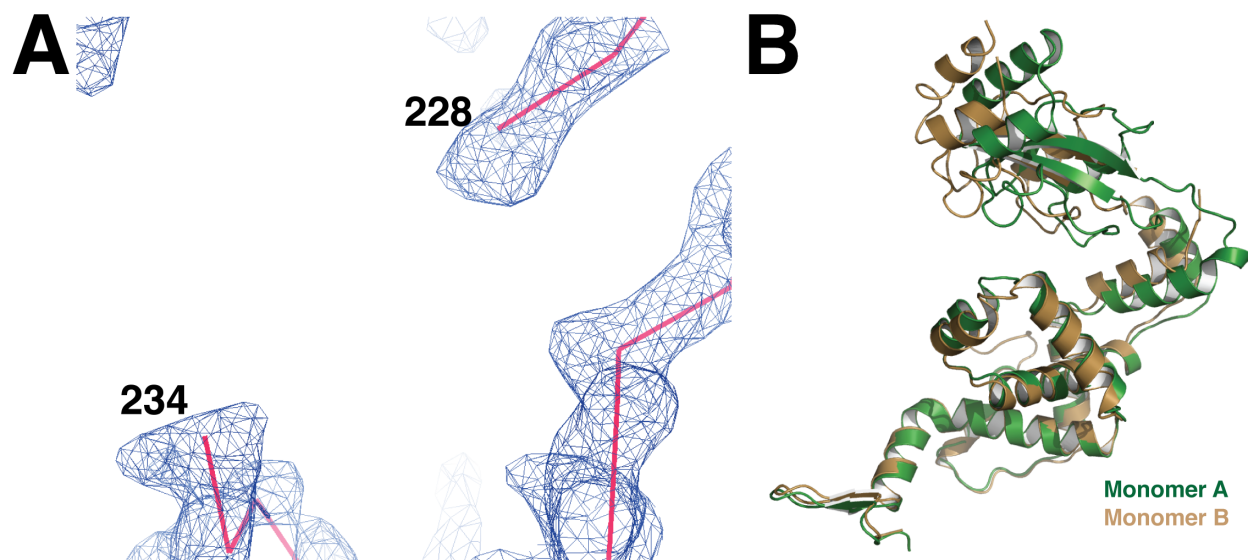

**Figure S1: PrsA1 monomers exhibit different conformations of the PPIase (A)** Electron density of residues 228 to 234 in monomer B contoured at 1 rmsd or 0.19 e/Å<sup>3</sup>. (B) Monomer A (green) and monomer B (gold) were aligned in Coot relative to the Foldase domain (residues 22-125 and 238-282) with an RMS of 1.021 Å<sup>2</sup>. The PPIase of monomer B is shifted by approximately 8 Å compared to monomer A.

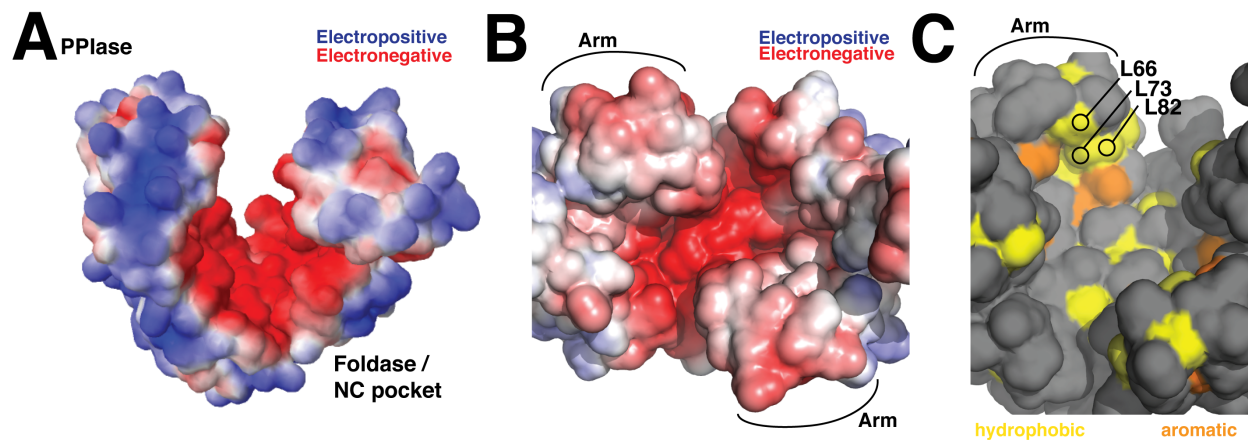

**Figure S2: Molecular surface comparison of *B. subtilis* PrsA and *Lm* PrsA1** (A) The dimeric PrsA structure (PDB accession code 4WO7) was used to calculate surface charge by APBS. (B) Electrostatic surface potential of the *Lm* PrsA1 foldase domain pocket generated by APBS. The contour is -5 to 5 kT/e. The 'Arm' regions of the Foldase domain are also outlined. (C) The hydrophobic character of *B. subtilis* NC or foldase domain. The hydrophobic patch on the arm domain is highlighted. Hydrophobic residues (A, G, I, L, M, F, V) are colored in yellow, aromatic residues (Y, W, but not F) in orange.

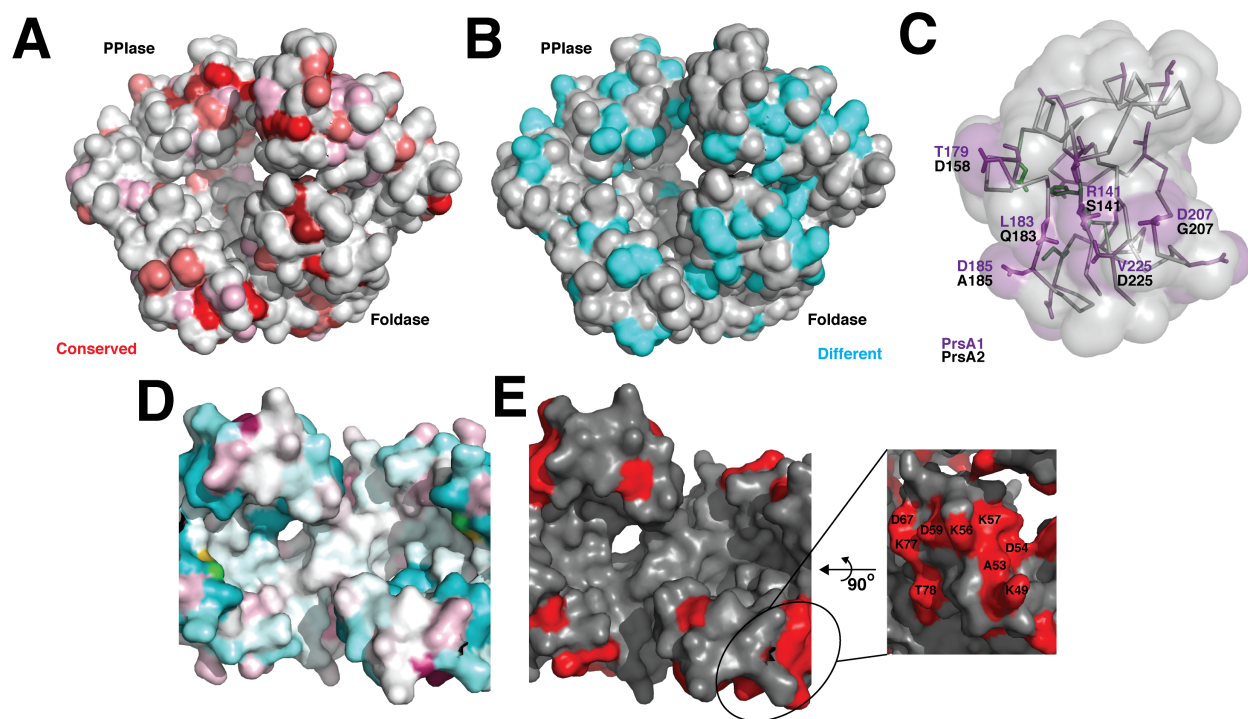

**Figure S3: Surface residue conservation of the *Lm* PrsA1 and PrsA2 molecular chaperones.** (A) Conserved surface residues of the PrsA chaperone family mapped to the *Lm* PrsA1 structure as determined by Consurf. Homologous residues are pink and dark pink and strictly conserved in red. (B) Surface residues that differ between *Lm* PrsA1 and *Lm* PrsA2 are shown in blue (C) A 90° rotation from Figure 3A is shown to display the surface opposite the PPlase active site. A patch of residue difference between PrsA1 (purple) and PrsA2 (black) is shown. (D) Consurf server output of the *Lm* PrsA1 foldase pocket showing conserved residues from 89 PrsA sequences. Blue represents no conservation (random residue), white neutral, and pink to dark red increasing conservation with dark red as absolute conservation. (E) Non-homologous sequence differences between *Lm* PrsA1 and *Lm* PrsA2 foldase are highlighted in red. Left panel is looking down into the Foldase domain from the PPlase domain(s). The right panel is a 90° rotation and zoom of the outer face of the ‘Arm’ region displaying a highly charged patch of residues that differ between *Lm* PrsA1 and *Lm* PrsA2. The PrsA1 residues are listed.

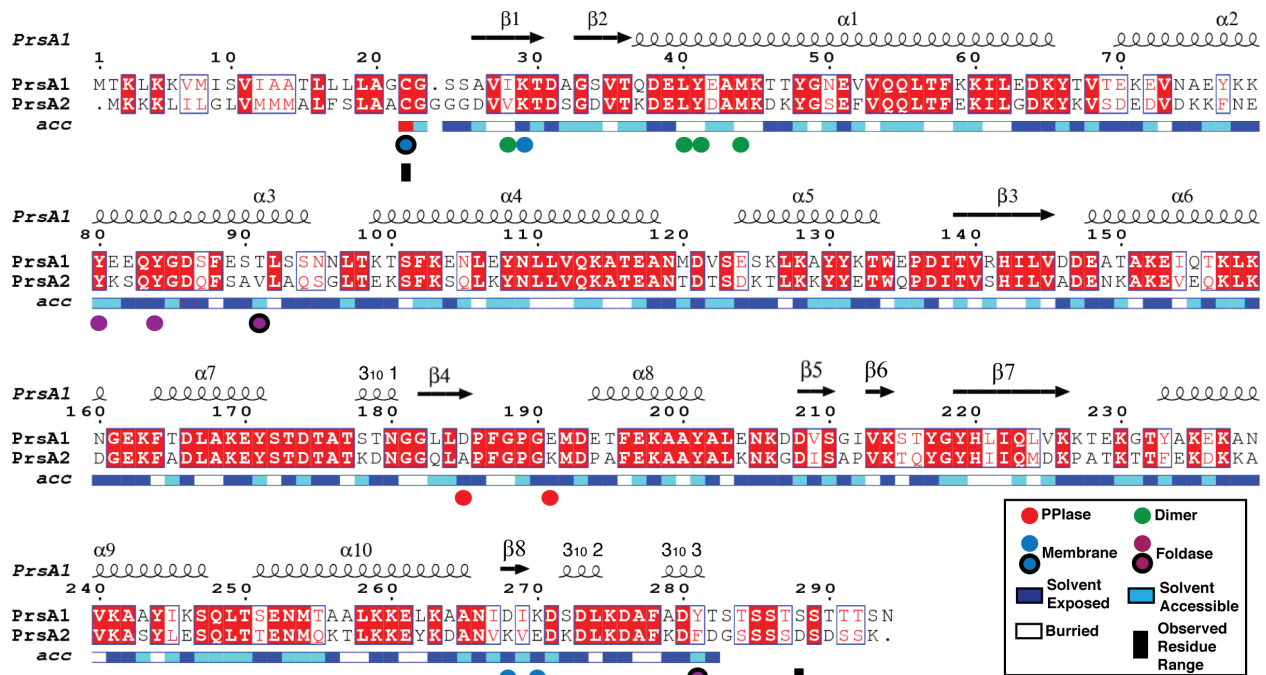

**Figure S4: Annotated sequence alignment of *Lm* PrsA1 and *Lm* PrsA2** The alignment was generated using ClustalW and annotated with secondary structural elements using Esript3 (<http://esript.ibcp.fr/ESript/ESript/>). Areas of sequence identity are outlined by red boxes and sequence homology by red letters. Secondary structure elements are represented by spirals ( $\alpha$ -helix) and arrows ( $\beta$ -sheet). Solvent accessible and buried residues are indicated by blue (solvent exposed), cyan (solvent accessible), and white (buried) boxes. Residues that were mutated are indicated by colored circle with a black outline showing residues that were studied individually.

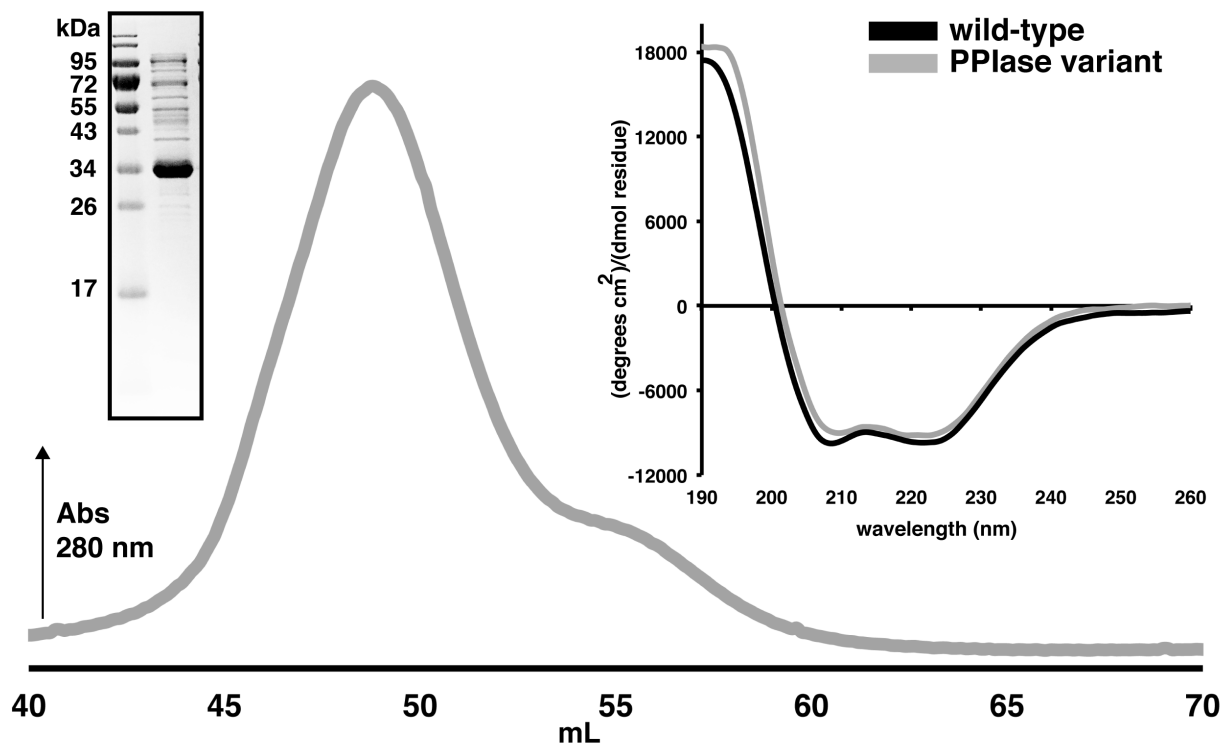

**Figure S5: PPlase variant control assay** Gel-filtration profile of the PrsA1 PPlase variant (D185A/E191K). Dimerized PrsA1 elutes at ~ 49 mL and monomeric PrsA1 at ~ 55 mL. The left inset shows the purified variant PrsA1 separated by SDS-PAGE gel visualized by Coomassie stain. The right inset shows the circular dichroism spectra of PrsA1 wild-type and the PPlase variant plotted as mean residue ellipticity.

**Table S1. Strains and Designations**

| Strain or Plasmid | Description                                                     | Designation                 | Reference                     |
|-------------------|-----------------------------------------------------------------|-----------------------------|-------------------------------|
| TOP10             | <i>E. coli</i> propagation strain                               |                             | Invitrogen                    |
| S17-1             | <i>E. coli</i> conjugation strain                               |                             |                               |
| SM10              | <i>E. coli</i> conjugation strain                               |                             |                               |
| BL21 (DE3)*       | <i>E. coli</i> protein expression strain                        |                             | Invitrogen                    |
| DH5 $\alpha$ l/q  | <i>E. coli</i> protein expression strain                        |                             | NEB                           |
| NF-L100           | <i>L. monocytogenes</i> 10403S parent strain                    | wt                          | (Bishop & Hinrichs, 1987)     |
| NF-L1651          | 10403S with $\Delta prsA2::erm$                                 | $\Delta prsA2$              | (Alonzo <i>et al.</i> , 2009) |
| NF-L1631          | NF-L1438 ( $\Delta prsA1$ ) transduced with $\Delta prsA2::erm$ | $\Delta prsA2/\Delta prsA1$ | (Alonzo & Freitag, 2010)      |
| NF-L3790          | NF-L1651 with integrated pPL2- <i>prsA2</i> wild-type           | <i>prsA2</i> wt complement  | This work                     |
| NF-L3792          | NF-L1651 with integrated pPL2- <i>prsA2</i> A185D/K191E         | PPIase A185D/K191E          | This work                     |
| NF-L3794          | NF-L1651 with integrated pPL2- <i>prsA2</i> K268A/K29A          | Membrane K268A/K29A         | This work                     |
| NF-L3796          | NF-L1651 with integrated pPL2- <i>prsA2</i> K268A/K29A/C21S     | Membrane K268A/K29A/C21S    | This work                     |
| NF-L3798          | NF-L1651 with integrated pPL2- <i>prsA2</i> C21S                | Membrane C21S               | This work                     |
| NF-L3800          | NF-L1651 with integrated pPL2- <i>prsA2</i> F281A               | Foldase F281A               | This work                     |
| NF-L3802          | NF-L1651 with integrated pPL2- <i>prsA2</i> F281A/Y80A/Y84A     | Foldase F281A/Y80A/Y84A     | This work                     |
| NF-L3804          | NF-L1651 with integrated pPL2- <i>prsA2</i> V90T                | Foldase V90T                | This work                     |
| NF-L3806          | NF-L1651 with integrated pPL2- <i>prsA2</i> V28A/L40A/Y41A/M44A | Dimer V28A/L40A/Y41A/M44A   | This work                     |
| NF-L3808          | NF-L1651 with integrated pPL2- <i>prsA2</i> V28A/L40A/Y41A      | Dimer V28A/L40A/Y41A        | This work                     |
| NF-L3810          | NF-L1651 with integrated pPL2- <i>prsA2</i> V28A/L40A           | Dimer V28A/L40A             | This work                     |
| NF-L3812          | NF-L1651 with integrated                                        | Dimer V28A                  | This work                     |

|          |                                                                                                                             |                            |                               |
|----------|-----------------------------------------------------------------------------------------------------------------------------|----------------------------|-------------------------------|
|          | pPL2- <i>prsA2</i> V28A                                                                                                     |                            |                               |
| NF-L3814 | NF-L1631 with integrated pPL2- <i>prsA1</i> wild-type                                                                       | <i>prsA1</i> wt complement | This work                     |
| NF-L3816 | NF-L1631 with integrated pPL2- <i>prsA1</i> D185A/E191K                                                                     | PPIase D185A/E191K         | This work                     |
| NF-L3818 | NF-L1631 with integrated pPL2- <i>prsA1</i> K270E/K29A                                                                      | Membrane K270E/K29A        | This work                     |
| NF-L3820 | NF-L1631 with integrated pPL2- <i>prsA1</i> K270E/K29A/C21S                                                                 | Membrane K270E/K29A/C21S   | This work                     |
| NF-L3822 | NF-L1631 with integrated pPL2- <i>prsA1</i> C21S                                                                            | Membrane C21S              | This work                     |
| NF-L3823 | NF-L1631 with integrated pPL2- <i>prsA1</i> Y281A                                                                           | Foldase Y281A              | This work                     |
| NF-L3824 | NF-L1631 with integrated pPL2- <i>prsA1</i> Y281A/Y80A/Y84A                                                                 | Foldase Y281A/Y80A/Y84A    | This work                     |
| NF-L3826 | NF-L1631 with integrated pPL2- <i>prsA1</i> T91V                                                                            | Foldase T91V               | This work                     |
| NF-L3828 | NF-L1631 with integrated pPL2- <i>prsA1</i> V28A/L40A/Y41A/M44A                                                             | Dimer V28A/L40A/Y41A/M44A  | This work                     |
| NF-L3830 | NF-L1631 with integrated pPL2- <i>prsA1</i> V28A/L40A/Y41A                                                                  | Dimer I28A/L40A/Y41A       | This work                     |
| NF-L3832 | NF-L1631 with integrated pPL2- <i>prsA1</i> V28A/L40A                                                                       | Dimer I28A/L40A            | This work                     |
| NF-L3834 | NF-L1631 with integrated pPL2- <i>prsA1</i> V28A                                                                            | Dimer I28A                 | This work                     |
| pQE60    | C-terminal His-tagged expression strain                                                                                     |                            | Qiagen                        |
| pNF-1965 | pQE60- <i>prsA1</i>                                                                                                         |                            | (Alonzo <i>et al.</i> , 2011) |
| pNF-1764 | pQE60- <i>prsA2</i>                                                                                                         | wild-type                  | (Alonzo <i>et al.</i> , 2011) |
| pNF-4037 | pQE60- <i>prsA1</i> V28A/L40A/Y41A/M44A                                                                                     | dimer variant              | This work                     |
| pPL2     | Integrative vector for single copy gene complementation in <i>Lm</i>                                                        |                            | (Lauer <i>et al.</i> , 2002)  |
| pNF-3838 | pPL2- <i>prsA2</i> (containing the open reading from of <i>prsA2</i> including 580 bp upstream and 68 bp downstream region) |                            | This work                     |
| pNF-3840 | pPL2- <i>prsA2</i> A185D/K191E                                                                                              |                            | This work                     |
| pNF-3842 | pPL2- <i>prsA2</i> K268A/K29A                                                                                               |                            | This work                     |
| pNF-3844 | pPL2- <i>prsA2</i>                                                                                                          |                            | This work                     |

|          |                                                                                                                                     |  |           |
|----------|-------------------------------------------------------------------------------------------------------------------------------------|--|-----------|
|          | K268A/K29A/C21S                                                                                                                     |  |           |
| pNF-3846 | pPL2- <i>prsA2</i> C21S                                                                                                             |  | This work |
| pNF-3848 | pPL2- <i>prsA2</i> F281A                                                                                                            |  | This work |
| pNF-3850 | pPL2- <i>prsA2</i><br>F281A/Y80A/Y84A                                                                                               |  | This work |
| pNF-3852 | pPL2- <i>prsA2</i> V90T                                                                                                             |  | This work |
| pNF-3854 | pPL2- <i>prsA2</i><br>V28A/L40A/Y41A/M44A                                                                                           |  | This work |
| pNF-3855 | pPL2- <i>prsA2</i> V28A/L40A/Y41A                                                                                                   |  | This work |
| pNF-3856 | pPL2- <i>prsA2</i> V28A/L40A                                                                                                        |  | This work |
| pNF-3858 | pPL2- <i>prsA2</i> V28A                                                                                                             |  | This work |
| pNF-3860 | pPL2- <i>prsA1</i> (containing the<br>open reading from of <i>prsA1</i><br>including 95 bp upstream and<br>66 bp downstream region) |  | This work |
| pNF-3862 | pPL2- <i>prsA1</i> D185A/E191K                                                                                                      |  | This work |
| pNF-3864 | pPL2- <i>prsA1</i> K270E/K29A                                                                                                       |  | This work |
| pNF-3866 | pPL2- <i>prsA1</i><br>K270E/K29A/C21S                                                                                               |  | This work |
| pNF-3867 | pPL2- <i>prsA1</i> C21S                                                                                                             |  | This work |
| pNF-3868 | pPL2- <i>prsA1</i> Y281A                                                                                                            |  | This work |
| pNF-3870 | pPL2- <i>prsA1</i><br>Y281A/Y80A/Y84A                                                                                               |  | This work |
| pNF-3872 | pPL2- <i>prsA1</i> T91V                                                                                                             |  | This work |
| pNF-3874 | pPL2- <i>prsA1</i><br>V28A/L40A/Y41A/M44A                                                                                           |  | This work |
| pNF-3876 | pPL2- <i>prsA1</i> V28A/L40A/Y41A                                                                                                   |  | This work |
| pNF-3878 | pPL2- <i>prsA1</i> V28A/L40A                                                                                                        |  | This work |
| pNF-3880 | pPL2- <i>prsA1</i> V28A                                                                                                             |  | This work |

**Table S2. Oligonucleotides used in this study.**

| Oligonucleotide | Sequence                         | Use                                                                          |
|-----------------|----------------------------------|------------------------------------------------------------------------------|
| prsA2UPSacF1    | 5'AGTAGAGCTCggctagctgccgtatgtatt | Forward primer for amplification of and complementation with of <i>prsA2</i> |
| prsA2XmaR1      | 5'GCGCCCGGGTTCGTTTTATAATC        | Reverse primer for amplification of and complementation with of <i>prsA2</i> |
| prsA1UPSacF1    | 5'AGTAGAGCTCGACGGGCACAAATTCGAAGT | Forward primer for amplification of and complementation with of <i>prsA1</i> |
| prsA1XmaR2      | 5'AGTACCCGGGGCGTGTGTTTTGACGGGAA  | Reverse primer for amplification of and complementation with of <i>prsA1</i> |



|                |                                              |                                                                                       |
|----------------|----------------------------------------------|---------------------------------------------------------------------------------------|
| LmPrsA2F1      | 5'ATCGAAAGTGCAGAACGTGG                       | Sequencing of <i>prsA2</i>                                                            |
| LmPrsA2F1RC    | 5'CCACGTTCTGCACTTTTCGAT                      | Sequencing of <i>prsA2</i>                                                            |
| LmPrsA2F2      | 5'CTGACACTAGCGACAAAACAC                      | Sequencing of <i>prsA2</i>                                                            |
| LmPrsA2F2RC    | 5'GTGTTTTGTGCTAGTGTGCTAG                     | Sequencing of <i>prsA2</i>                                                            |
| LmPrsA1F1      | 5'CCAGATATTACTGTTTCGCC                       | Sequencing of <i>prsA1</i>                                                            |
| LmPrsA1F1RC    | 5'GGCGAACAGTAATATCTGG                        | Sequencing of <i>prsA1</i>                                                            |
| prsA1-D185A    | 5'CAAAAAAATCTTAGAAGcTAAATACACCGTAACAG        | Site directed mutagenesis                                                             |
| prsA1-D185Arc  | 5'CTGTTACGGTGTATTTAgcTTCTAAGATTTTTTTG        | Site directed mutagenesis                                                             |
| prsA1-E191K    | 5'TAAATACACCGTAACAaAAAAAGAAGTAAATGC          | Site directed mutagenesis                                                             |
| prsA1-E191Krc  | 5'GCATTTACTTCTTTTTtGTTACGGTGTATTTA           | Site directed mutagenesis                                                             |
| prsA1-I28A     | 5'GGAAGTAGCGCTGTTgcAAAAACAGATGCAGG           | Site directed mutagenesis                                                             |
| prsA1-I28Arc   | 5'CCTGCATCTGTTTTTgcAACAGCGCTACTTCC           | Site directed mutagenesis                                                             |
| prsA1-L40A     | 5'GTCACACAAGATGAGgcTTACGAAGCAATGAAAA<br>CG   | Site directed mutagenesis                                                             |
| prsA1-L40Arc   | 5'CGTTTTTCATTGCTTCGTAAgcCTCATCTTGTGTGA<br>C  | Site directed mutagenesis                                                             |
| prsA1-Y41A     | 5'CACACAAGATGAGgcTgcCGAAGCAATGAAAACGA<br>C   | Site directed mutagenesis ,<br>contains mutation L40A in<br>addition to Y41A          |
| prsA1-Y41Arc   | 5'GTCGTTTTTCATTGCTTCGgcAgcCTCATCTTGTGT<br>G  | Site directed mutagenesis,<br>contains mutation L40A in<br>addition to Y41A           |
| prsA1-M44A     | 5'GAGgcTgcCGAAGCagcGAAAACGACTTATGGAAA<br>TG  | Site directed mutagenesis,<br>contains mutations L40A and<br>Y41A in addition to M44A |
| prsA1-M44Arc   | 5'CATTTCCATAAGTCGTTTTTCgcTGCTTCGgcAgcCT<br>C | Site directed mutagenesis,<br>contains mutations L40A and<br>Y41A in addition to M44A |
| prsA1-K270E    | 5'GCTAATATTGATAATTgAAGATAGTGATTT             | Site directed mutagenesis                                                             |
| prsA1-K270Erc  | 5'AAATCACTATCTTcAATTATCAATATTAGC             | Site directed mutagenesis                                                             |
| prsA1-K29A     | 5'GTAGCGCTGTTATAgcAACAGATGCAGG               | Site directed mutagenesis                                                             |
| prsA1-K29Arc   | 5'CCTGCATCTGTTgcTATAACAGCGCTAC               | Site directed mutagenesis                                                             |
| prsA1-C21S     | 5'CTGCTCGCTGGTTcTGGAAGTAGCGC                 | Site directed mutagenesis                                                             |
| prsA1-C21Src   | 5'GCGCTACTTCCAgAACCAGCGAGCAG                 | Site directed mutagenesis                                                             |
| prsA1-Y281A    | 5'GATGCATTTGCAGATgcCACAAAGTACATCCTCAAC       | Site directed mutagenesis                                                             |
| prsA1-Y281YArc | 5'GTTGAGGATGTACTTGTGgcATCTGCAAATGCAT<br>C    | Site directed mutagenesis                                                             |
| prsA1-Y80A     | 5'CAGAATATAAGAAAgcTGAAGAACAATACG             | Site directed mutagenesis                                                             |
| prsA1-Y80Arc   | 5'CGTATTGTTCTTCAgcTTTCTTATATTCTG             | Site directed mutagenesis                                                             |
| prsA1-Y84A     | 5'GAAAgcTGAAGAACAAGcCGGTGACTCATTTG           | Site directed mutagenesis, contains<br>mutation Y80A in addition to Y84A              |
| prsA1-Y84Arc   | 5'CAAATGAGTCACCGgcTTGTTCTTCAgcTTTC           | Site directed mutagenesis, contains<br>mutation Y80A in addition to Y84A              |
| prsA1-T90V     | 5'GTGACTCATTTGAATCAgtGTTATCCTCTAATAAT<br>T   | Site directed mutagenesis                                                             |
| prsA1-T90Vrc   | 5'AATTATTAGAGGATAACacTGATTCAAATGAGTC<br>AC   | Site directed mutagenesis                                                             |
| prsA2-A185D    | 5'GTGGACAATTAGaTCCATTCGGTCC                  | Site directed mutagenesis                                                             |

|               |                                                     |                                                                                       |
|---------------|-----------------------------------------------------|---------------------------------------------------------------------------------------|
| prsA2-A185Drc | 5'GGACCGAATGGAtCTAATTGTCCAC                         | Site directed mutagenesis                                                             |
| prsA2-K191E   | 5'CATTTCGGTCCTGGTgAAATGGATCCAGC                     | Site directed mutagenesis                                                             |
| prsA2-K191Erc | 5'GCTGGATCCATTTcACCAGGACCGAATG                      | Site directed mutagenesis                                                             |
| prsA2-V28A    | 5'GTGGCGGCGGAGATGTcGcTAAGACAGACTCTGG<br>CG          | Site directed mutagenesis                                                             |
| prsA2-V28Arc  | 5'CGCCAGAGTCTGTCTTAgCGACATCTCCGCCGCCA<br>C          | Site directed mutagenesis                                                             |
| prsA2-L40A    | 5'GTAACAAAAGACGAAgcTTATGACGCAATGAAAG                | Site directed mutagenesis                                                             |
| prsA2-L40Arc  | 5'CTTTCATTGCGTCATAAgcTTCGTCTTTTGTAC                 | Site directed mutagenesis                                                             |
| prsA2-Y41A    | 5'CAAAAGACGAAgcTgcTGACGCAATGAAAG                    | Site directed mutagenesis,<br>contains mutation L40A in<br>addition to Y41A           |
| prsA2-Y41Arc  | 5'CTTTCATTGCGTCAGcAgcTTCGTCTTTTG                    | Site directed mutagenesis,<br>contains mutation L40A in<br>addition to Y41A           |
| prsA2-M44A    | 5'GAAgcTgcTGACGCAgcGAAAGATAAATATG                   | Site directed mutagenesis,<br>contains mutations L40A and<br>Y41A in addition to M44A |
| prsA2-M44Arc  | 5'CATATTTATCTTTCgcTGCGTCAGcAgcTTC                   | Site directed mutagenesis,<br>contains mutations L40A and<br>Y41A in addition to M44A |
| prsA2-K268A   | 5'CAAAGATGCTAACGTGgcAGTGGAAAGACAAAGAC               | Site directed mutagenesis                                                             |
| prsA2-K268Arc | 5'GTCTTTGTCTTCCACTgcCACGTTAGCATCTTTG                | Site directed mutagenesis                                                             |
| prsA2-K29A    | 5'GGAGATGTCGTTgcGACAGACTCTGG                        | Site directed mutagenesis                                                             |
| prsA2-K29Arc  | 5'CCAGAGTCTGTcgcAACGACATCTCC                        | Site directed mutagenesis                                                             |
| prsA2-C21S    | 5'GGCATTGTTcAGTCTAGCAGCGTcCGGTGGCGGGC<br>GAGATGTCCG | Site directed mutagenesis                                                             |
| prsA2-C21Src  | 5'CGACATCTCCGCCGCCACCGgACGCTGCTAGACTG<br>AACAATGCC  | Site directed mutagenesis                                                             |
| prsA2-F281A   | 5'GATGCTTTTAAAGATgcTGATGGTTCTTCATCCAG               | Site directed mutagenesis                                                             |
| prsA2-F281Arc | 5'CTGGATGAAGAACCATCAgcATCTTTAAAAGCAT<br>C           | Site directed mutagenesis                                                             |
| prsA2-Y80A    | 5'CAAGAAATTCAACGAGgcTAAATCACAATACGGA<br>G           | Site directed mutagenesis                                                             |
| prsA2-Y80Arc  | 5'CTCCGTATTGTGATTTAgcCTCGTTGAATTTCTTG               | Site directed mutagenesis                                                             |
| prsA2-84YtoA  | 5'CGAGgcTAAATCACAAGcCGGAGATCAATTCTCTG<br>C          | Site directed mutagenesis,<br>contains mutation Y80A in<br>addition to Y84A           |
| prsA2-Y84Arc  | 5'GCAGAGAATTGATCTCCGgcTTGTGATTTAgcCTC<br>G          | Site directed mutagenesis,<br>contains mutation Y80A in<br>addition to Y84A           |
| prsA2-V90T    | 5'GAGATCAATTCTCTGCAacTTTAGCTCAAAGTGCC               | Site directed mutagenesis                                                             |
| prsA2-V90Trc  | 5'GCCACTTTGAGCTAAAgTGCAGAGAATTGATCTC                | Site directed mutagenesis                                                             |

### References for Tables

- Alonzo, F., 3rd & N. E. Freitag, (2010) *Listeria monocytogenes* PrsA2 is required for virulence factor secretion and bacterial viability within the host cell cytosol. *Infection and immunity* **78**: 4944-4957.
- Alonzo, F., 3rd, G. C. Port, M. Cao & N. E. Freitag, (2009) The posttranslocation chaperone PrsA2 contributes to multiple facets of *Listeria monocytogenes* pathogenesis. *Infection and immunity* **77**: 2612-2623.
- Alonzo, F., 3rd, B. Xayarath, J. C. Whisstock & N. E. Freitag, (2011) Functional analysis of the *Listeria monocytogenes* secretion chaperone PrsA2 and its multiple contributions to bacterial virulence. *Molecular microbiology* **80**: 1530-1548.
- Bishop, D. K. & D. J. Hinrichs, (1987) Adoptive transfer of immunity to *Listeria monocytogenes*. The influence of in vitro stimulation on lymphocyte subset requirements. *J Immunol* **139**: 2005-2009.
- Lauer, P., M. Y. Chow, M. J. Loessner, D. A. Portnoy & R. Calendar, (2002) Construction, characterization, and use of two *Listeria monocytogenes* site-specific phage integration vectors. *Journal of bacteriology* **184**: 4177-4186.
